# Supplementary material for: Metabolomic profiling of emodin-induced cytotoxicity in human liver cells and mechanistic study
Source: Royal Society of Chemistry journal article supplement (doi:10.1039/c4tx00246f), 2015-01-01
Supplement: c4tx00246f1.pdf [file c4tx00246f1.pdf]

## Metabolomic Profiling of Emodin-induced Cytotoxicity in Human Liver Cells and the Mechanism Study

Xiaoyan Liu<sup>a,b</sup>, Yanqiu Liu<sup>a,c</sup>, Yang Qu<sup>a,d</sup>, Mengchun Cheng<sup>a</sup>, Hongbin Xiao<sup>a,e,\*</sup>

<sup>a</sup>Dalian Institute of Chemical Physics, Chinese Academy of Sciences, 457 Zhongshan Road, Dalian 116023, China

<sup>b</sup>University of Chinese Academy of Sciences, Beijing 100049, China

<sup>c</sup>College (Institute) of Integrative Medicine, Dalian Medical University, Dalian 116044, China

<sup>d</sup>College of Pharmacy, Liaoning University of Traditional Chinese Medicine, Dalian 116600, China

<sup>e</sup>Institute of Chinese Materia Medica, China Academy of Chinese Medical Sciences, Beijing 100700, China

**\*Corresponding author:** Prof. Hongbin Xiao, E-mail: [hb Xiao69@163.com](mailto:hb Xiao69@163.com); Tel: +86 411 8437 9756; Fax: +86 411 8437 9667

## Supplementary material

**ESM\_1** Kinetics of cytotoxicity induced by emodin in L-02 cells. The graph was plotted using GraphPad Prism

5.0

**ESM\_2** Morphological changes of L-02 cells cultured without emodin or with 10, 20 and 30  $\mu$ M emodin

**ESM\_3** Data quality assessment. **a.** The retention time deviation profile generated by XCMS. A positive deviation indicates that the sample was eluting after the median retention time, and a negative deviation indicates that the samples was eluting before the median retention time. **b.** PCA first component for the QC samples versus time analyzed. Raw data of QC sample was analyzed using XCMS online, which follows typical data processing steps, including peak discrimination, peak filtering, peak alignment, noise elimination and the generation of a matrix that consisted of the retention time, m/z value and the peak areas. The data was analyzed using SIMCA-P 11.0 (Umetrics, Sweden) software

**ESM\_4** Extracted ion chromatography of identified metabolites listed in Table S1 and the corresponding structures.

**ESM\_5** Chemical synthesis of emodin-cysteine adduct and structure validation. **a.** MS/MS fragments of emodin-cysteine synthesized through chemical reaction. **b.** Possible mass spectrometric pattern of emodin-cysteine.

Synthesis of emodin-cysteine adduct: Cysteine (24 mg, 0.2 mmol) was added to 20 ml of sodium carbonate buffer (pH 9.2). The pH was adjusted to 8.0 by adding 200 mM NaOH. A solution of emodin (5 mg) in DMSO (2.5 ml) was added to the cysteine solution, and the mixture was stirred overnight at room temperature. The reaction mixture was detected using analytical method described in "Section 2.4".

**Table S1** Summary of significant biomarkers identified under the positive and negative mode

**ESM\_1**

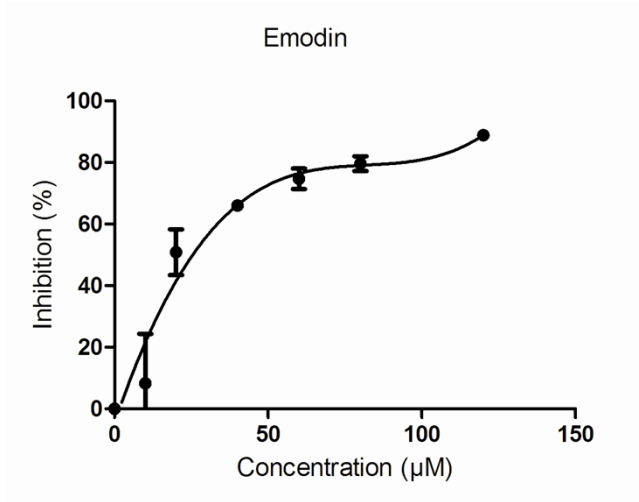

ESM\_2

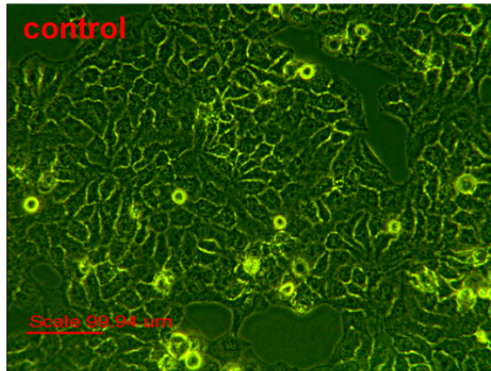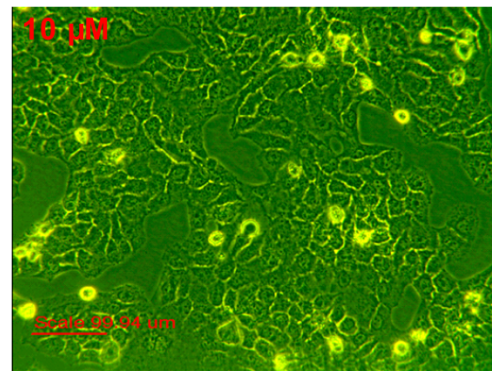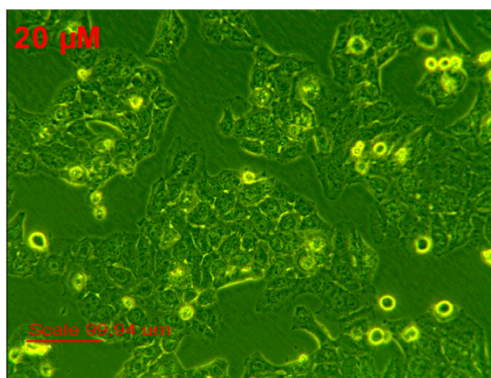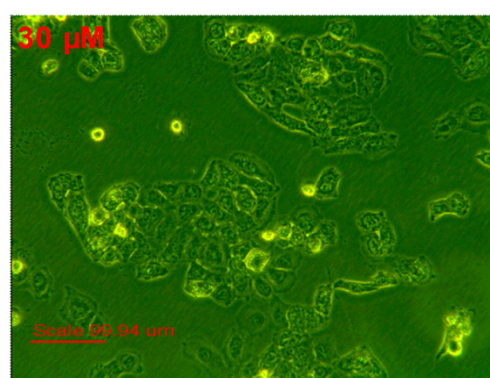

# ESM\_3

**a**

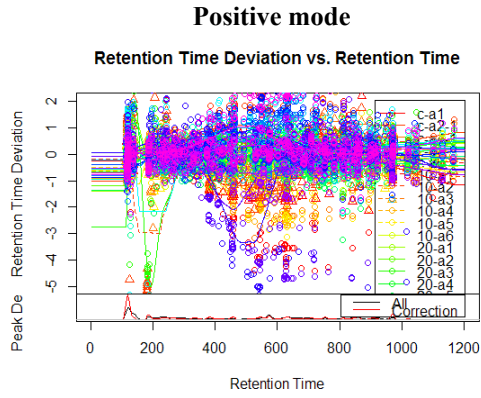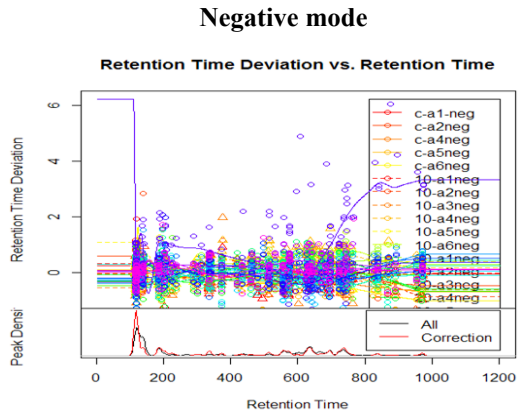

**b**

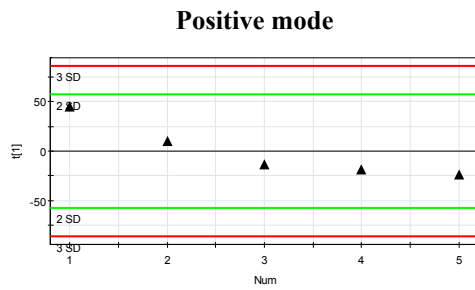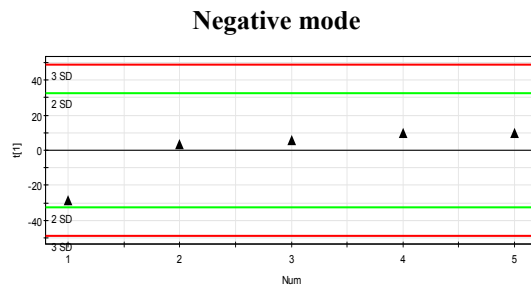

# ESM\_4

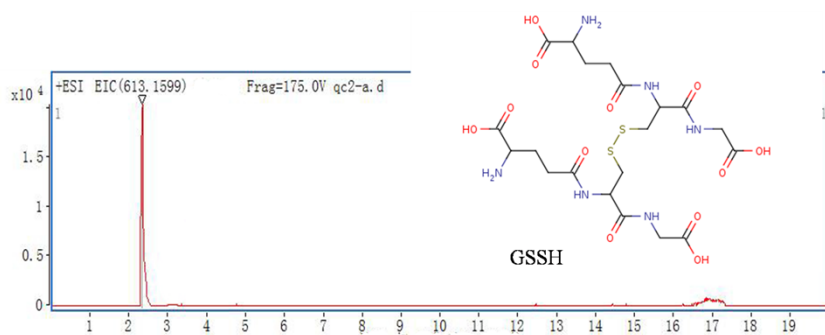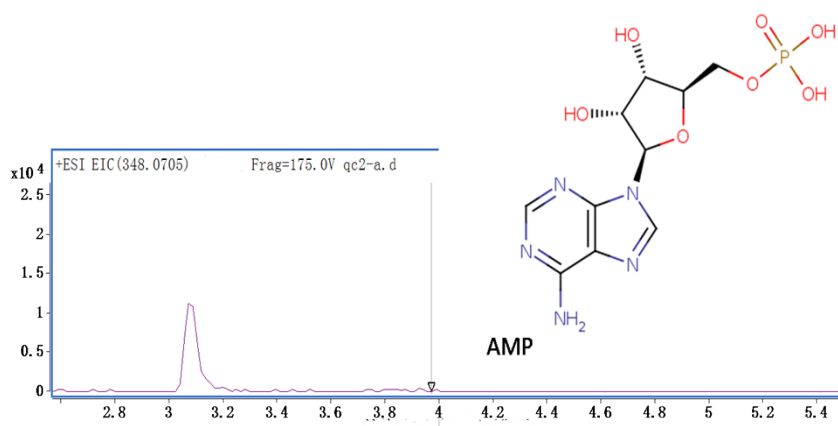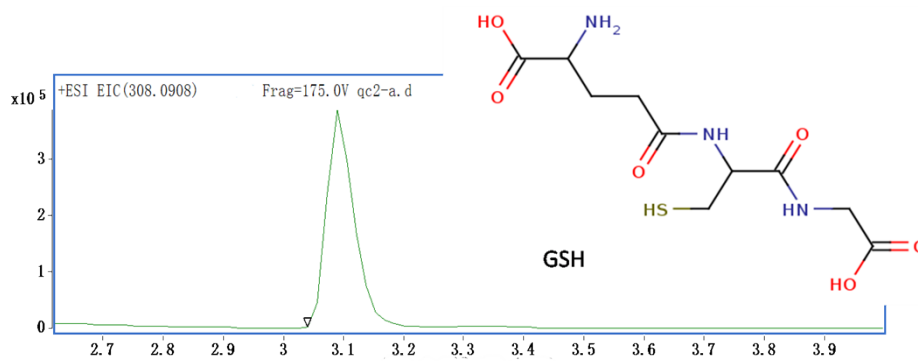

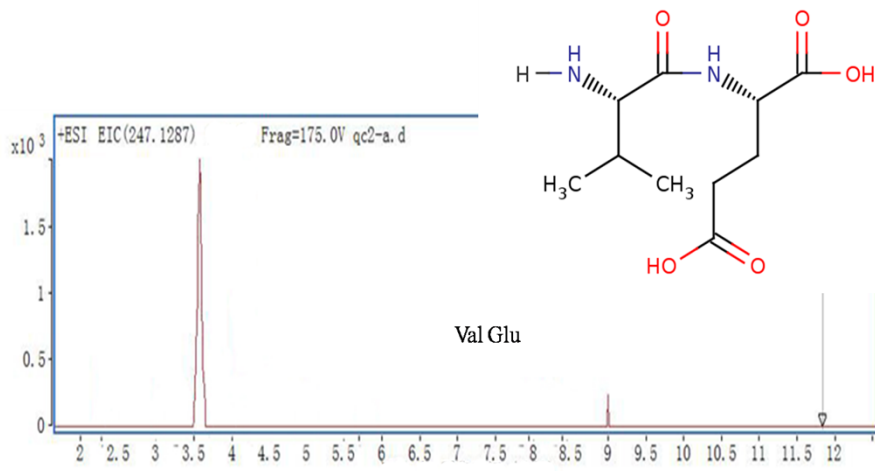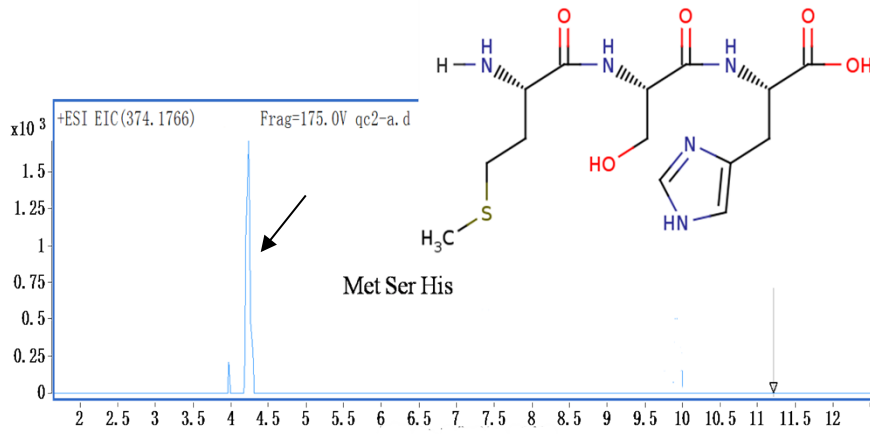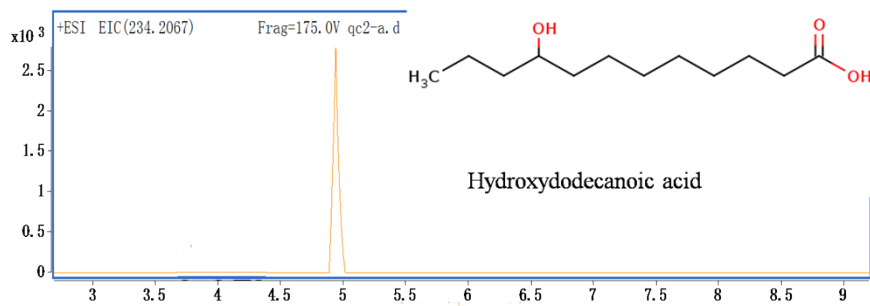

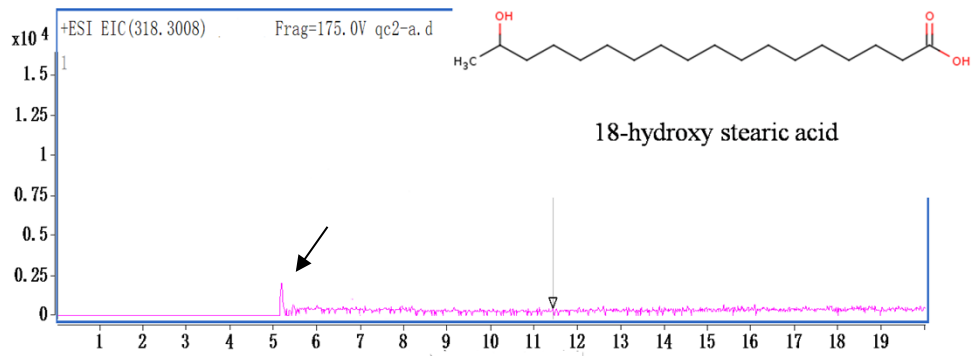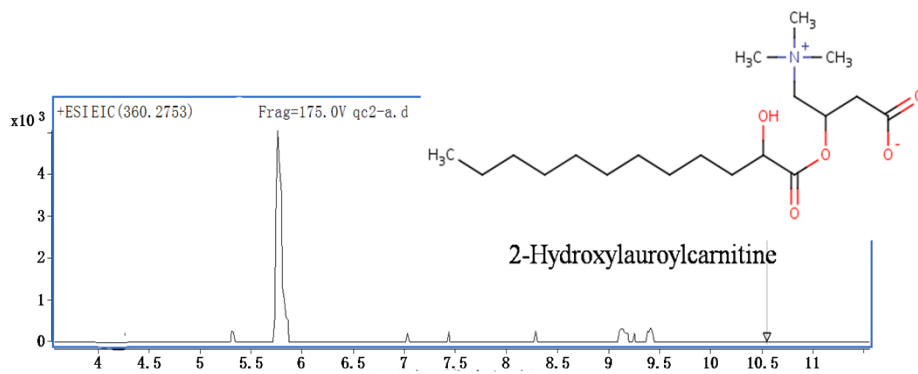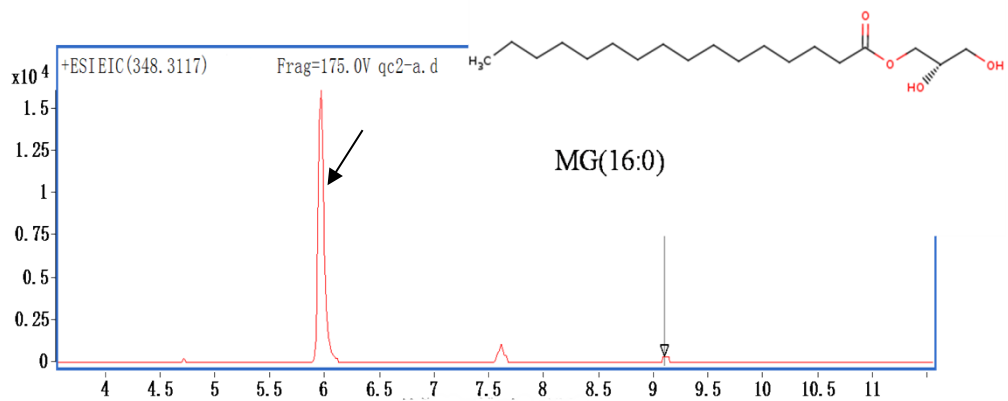



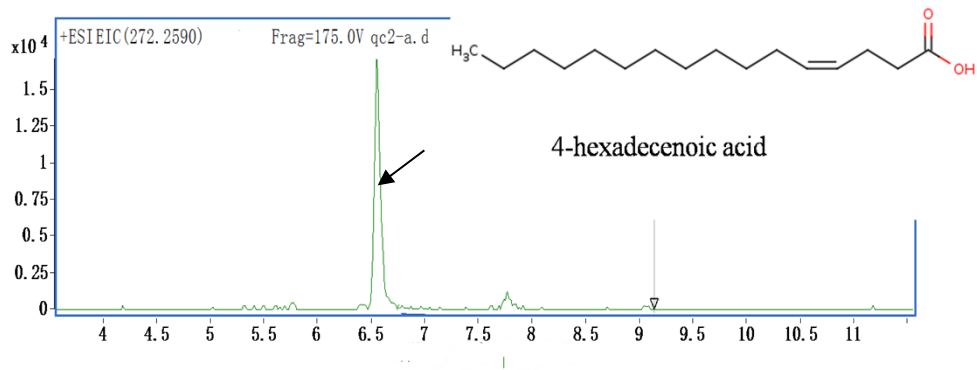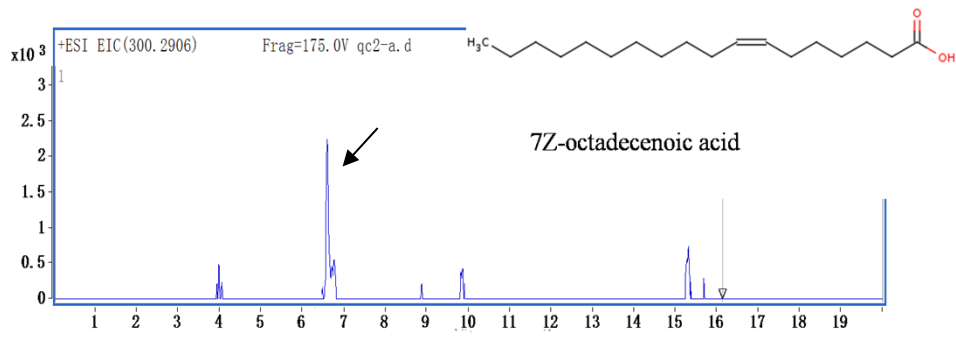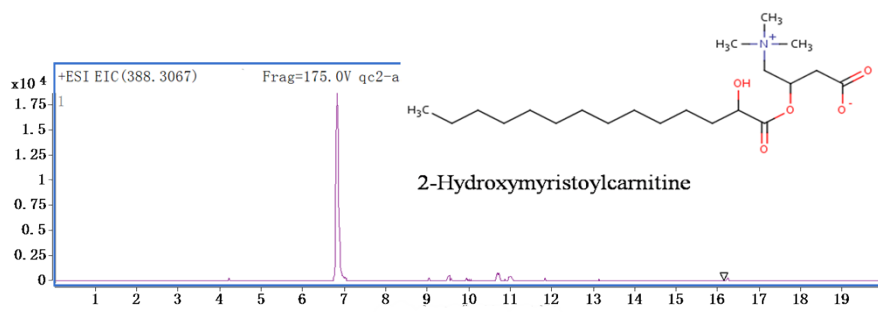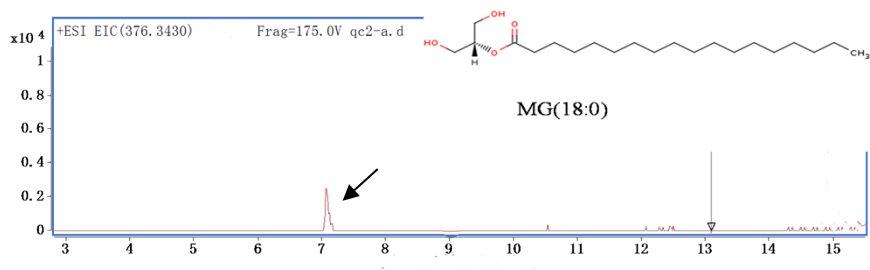

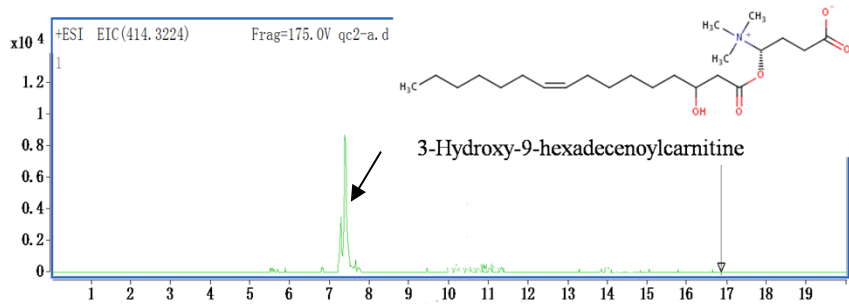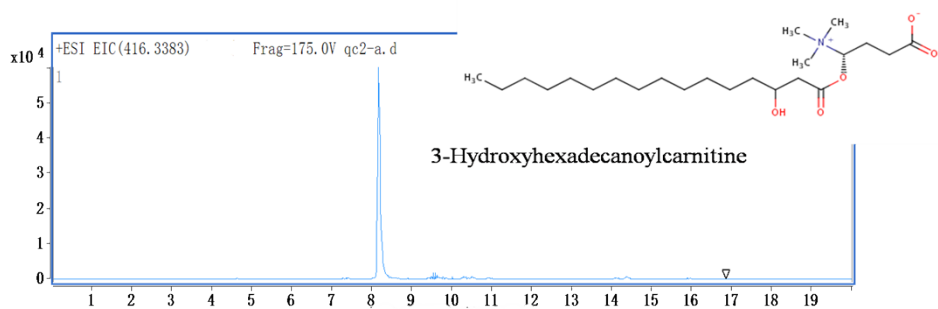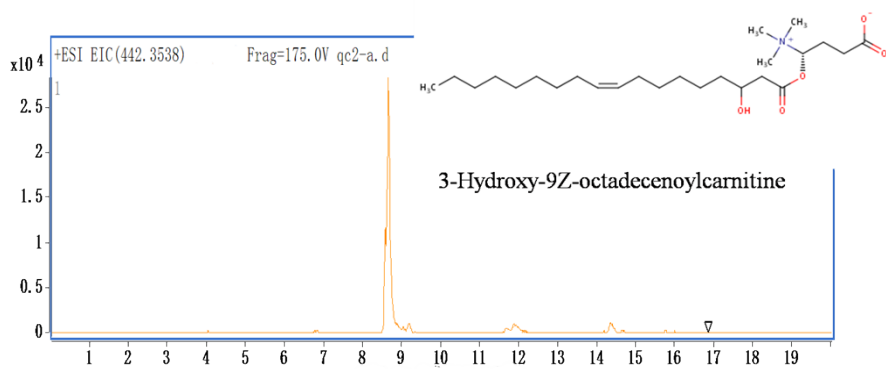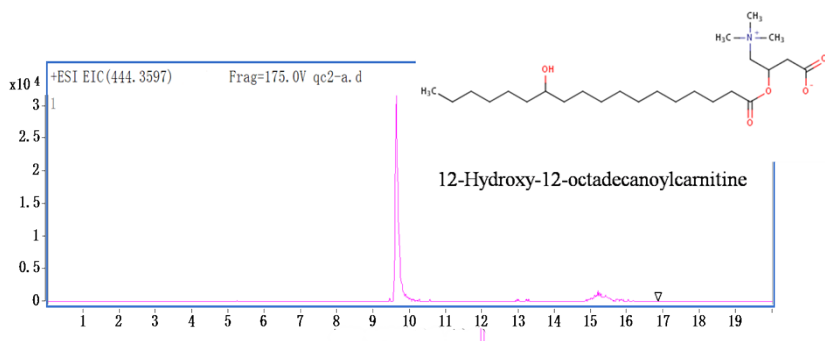

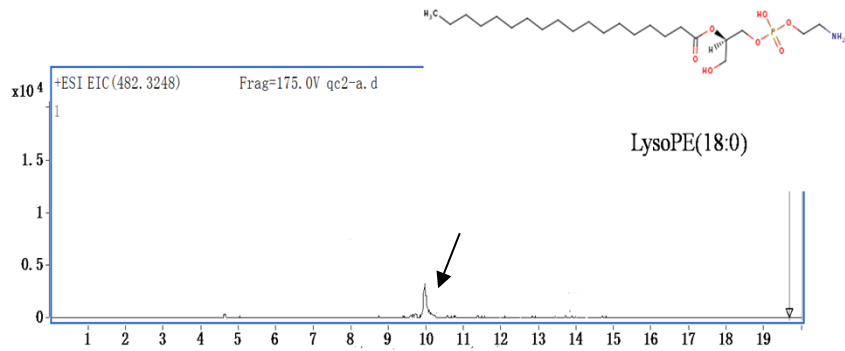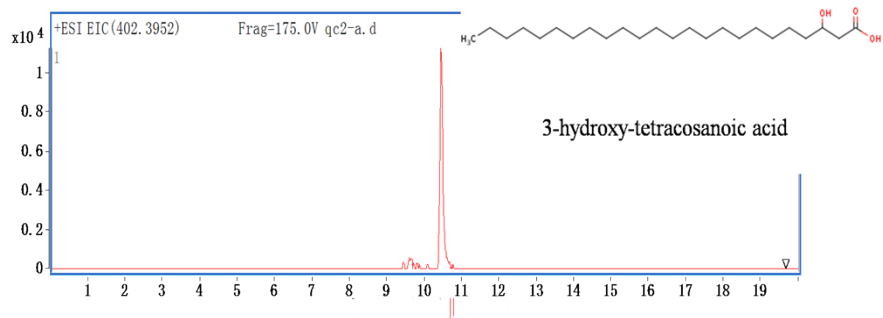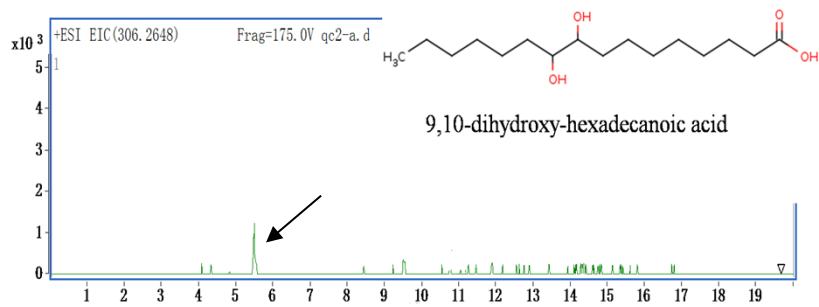

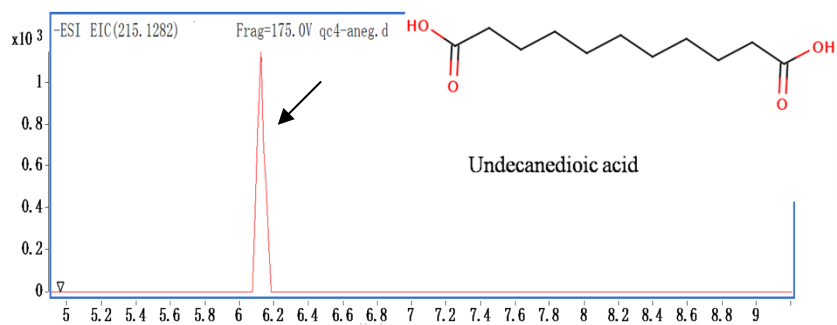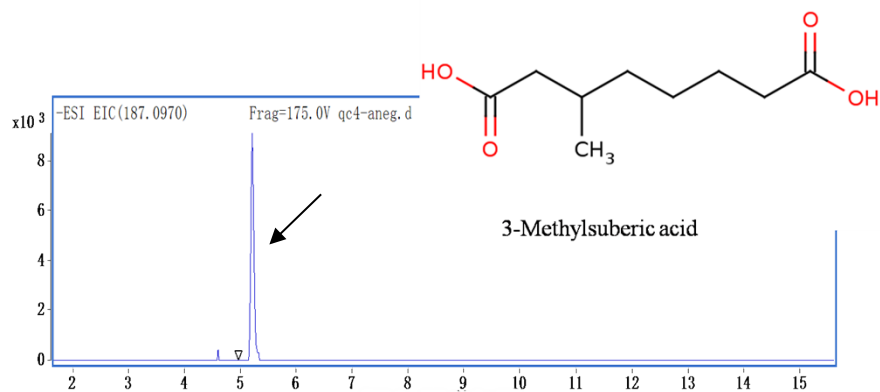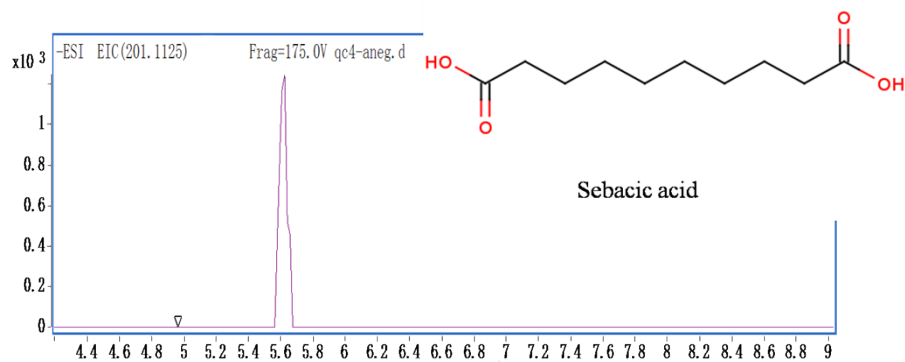

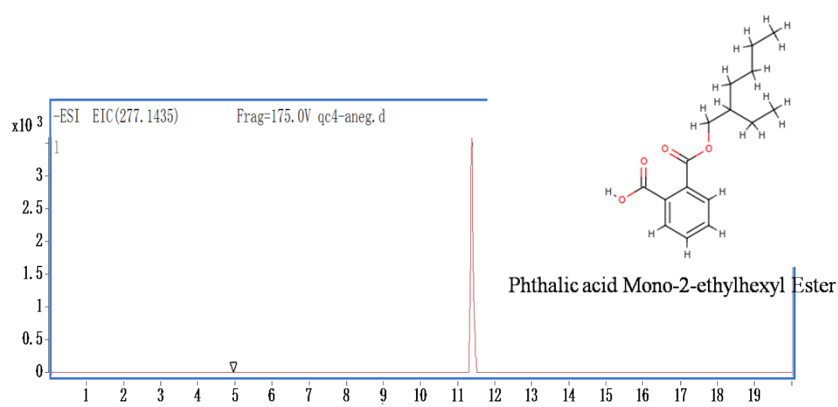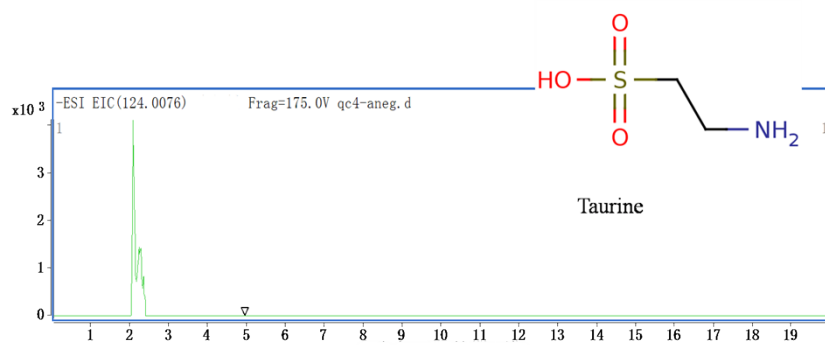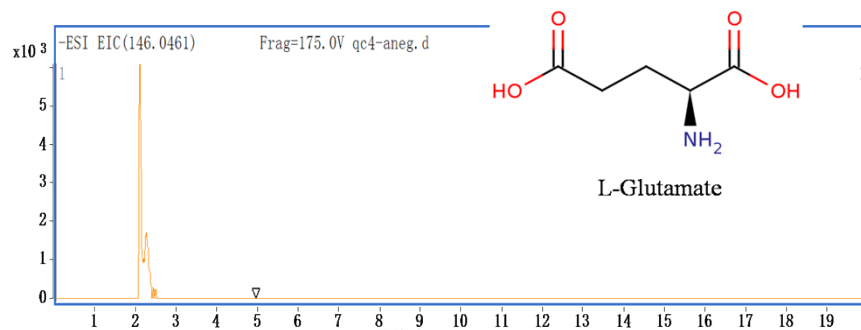

# ESM\_5

**a**

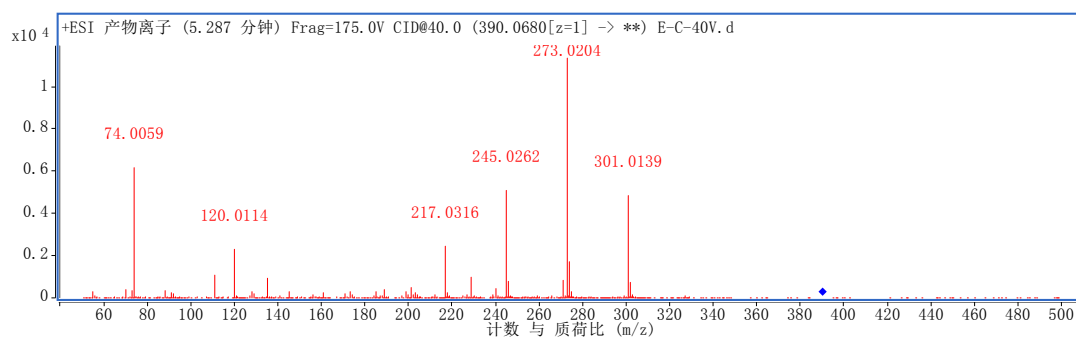

**b**

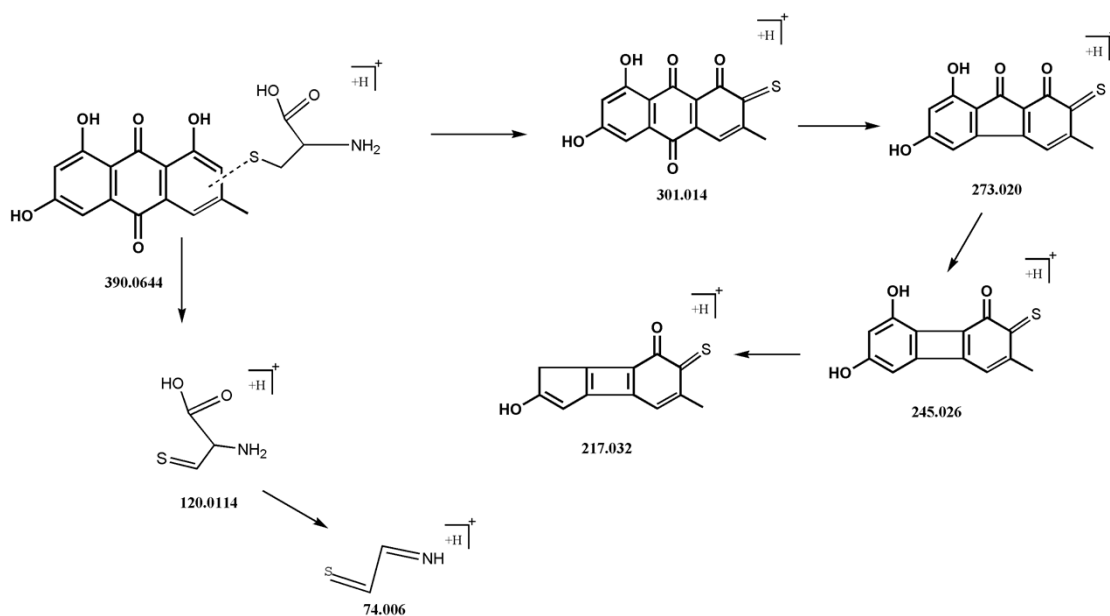

**Table S1** Summary of significant biomarkers identified under the positive and negative mode

| Num            | m/z      | Adduct                            | Formula                                                                          | $\Delta$ ppm | Rt (min) | Main MS/MS fragments                        | Identification                     | Compound ID          | <sup>a</sup> RSD (%) | <sup>b</sup> Up- and down-regulated |
|----------------|----------|-----------------------------------|----------------------------------------------------------------------------------|--------------|----------|---------------------------------------------|------------------------------------|----------------------|----------------------|-------------------------------------|
| <sup>d</sup> 1 | 613.1599 | [M+H] <sup>+</sup>                | C <sub>20</sub> H <sub>32</sub> N <sub>6</sub> O <sub>1</sub><br>2S <sub>2</sub> | 1.08         | 2.33     | 538.13,484.12,409.09<br>355.08,177.03       | Glutathione,<br>oxidized           | HMDB03337            | 16.5                 | ↓                                   |
| <sup>d</sup> 2 | 348.0705 | [M+H] <sup>+</sup>                | C <sub>10</sub> H <sub>14</sub> N <sub>5</sub> O <sub>7</sub><br>P               | -0.4         | 3.08     | 136.06,97.03                                | Adenosine<br>monophosphate         | HMDB00045            | 16.3                 | ↑                                   |
| <sup>e</sup> 3 | 308.0908 | [M+H] <sup>+</sup>                | C <sub>10</sub> H <sub>17</sub> N <sub>3</sub> O <sub>6</sub><br>S               | 0.92         | 3.1      | 198.08,152.06                               | Glutathione                        | HMDB00125            | 6.7                  | ↓                                   |
| 4              | 247.1287 | [M+H] <sup>+</sup>                | C <sub>10</sub> H <sub>18</sub> N <sub>2</sub> O <sub>5</sub>                    | 0.6          | 3.57     | 72.08,84.04,156.09,<br>184.09               | Val Glu                            | MID23976<br>(Metlin) | 21.5                 | ↑                                   |
| 5              | 374.1466 | [M+H] <sup>+</sup>                | C <sub>14</sub> H <sub>23</sub> N <sub>5</sub> O <sub>5</sub><br>S <sub>1</sub>  | -6.3         | 4.23     | 269.10,243.11,166.06,<br>110.07             | Met Ser His                        | MID16844             | 25.9                 | ↑                                   |
| 6              | 234.2067 | [M+NH <sub>4</sub> ] <sup>+</sup> | C <sub>12</sub> H <sub>24</sub> O <sub>3</sub>                                   | 1.41         | 4.95     | 55.05,69.07,83.06,107.08<br>163.15          | Hydroxydodecan<br>oic acid         | HMDB02059            | 11.4                 | ↑                                   |
| 7              | 318.3008 | [M+NH <sub>4</sub> ] <sup>+</sup> | C <sub>18</sub> H <sub>36</sub> O <sub>3</sub>                                   | 1.66         | 5.18     | 55.05,69.07,99.04,179.97,<br>240.11         | 18-hydroxy<br>stearic acid         | MID35448             | 2.7                  | ↑                                   |
| <sup>e</sup> 8 | 360.2753 | [M+H] <sup>+</sup>                | C <sub>19</sub> H <sub>37</sub> N <sub>5</sub> O <sub>5</sub>                    | -2.36        | 5.78     | 282.27,163.15,145.04,<br>103.04,85.03,60.08 | 2-<br>Hydroxy-lauroylc<br>arnitine | HMDB13164            | 12.7                 | ↑                                   |
| 9              | 348.3117 | [M+NH <sub>4</sub> ] <sup>+</sup> | C <sub>19</sub> H <sub>38</sub> O <sub>4</sub>                                   | 2.48         | 5.98     | 256.26,143.10,88.07,70.07                   | MG(16:0)                           | HMDB11564<br>/       | 4.4                  | ↑                                   |

|    |          |                      |            |       |      |                                        |                                             |                             |      |   | HMDB11533 |
|----|----------|----------------------|------------|-------|------|----------------------------------------|---------------------------------------------|-----------------------------|------|---|-----------|
| 10 | 272.259  | [M+NH4] <sup>+</sup> | C16H30O2   | 2.18  | 6.57 | 254.25,164.34,86.06,<br>70.06          | 4-hexadecenoic<br>acid                      | MID74430                    | 8.3  | ↑ |           |
| 11 | 300.2906 | [M+NH4] <sup>+</sup> | C18H34O2   | 2.98  | 6.62 | 132.10,100.08,84.08,71.08,<br>57.07    | 7Z-octadecenoic<br>acid                     | MID73806                    | 12.8 | ↑ |           |
| 12 | 388.3067 | [M+H] <sup>+</sup>   | C21H41NO5  | 2.45  | 6.83 | 312.38,145.05,85.03,60.08              | 2-<br>Hydroxymyristo<br>ylcarnitine         | HMDB13166                   | 9.5  | ↑ |           |
| 13 | 376.343  | [M+NH4] <sup>+</sup> | C21H42O4   | -2.3  | 7.1  | 284.29,141.11,118.09,88.07             | MG(18:0)                                    | HMDB11131<br>/<br>HMDB11535 | 7.1  | ↑ |           |
| 14 | 414.3224 | [M+H] <sup>+</sup>   | C23H43NO5  | 2.41  | 7.42 | 266.14,123.11,85.03,60.08              | 3-Hydroxy-9-<br>hexadecenoylcar<br>nitine   | HMDB13333                   | 21.2 | ↑ |           |
| 15 | 416.3383 | [M+H] <sup>+</sup>   | C23H45NO5  | 3.0   | 8.2  | 145.05,85.03,60.08                     | 3-<br>Hydroxyhexadec<br>anoylcarnitine      | HMDB13336                   | 9.7  | ↑ |           |
| 16 | 442.3538 | [M+H] <sup>+</sup>   | C25H47NO5  | 2.49  | 8.68 | 145.05,85.03,60.08                     | 3-Hydroxy-9Z-<br>octadecenoylcar<br>nitine  | HMDB13340                   | 9.2  | ↑ |           |
| 17 | 444.3597 | [M+H] <sup>+</sup>   | C25H49NO5  | 3.04  | 9.65 | 145.05,85.03,60.08                     | 12-Hydroxy-12-<br>octadecanoylcar<br>nitine | HMDB13154                   | 8.0  | ↑ |           |
| 18 | 482.3248 | [M+H] <sup>+</sup>   | C23H48NO7P | -1.42 | 9.97 | 465.43,339.29,258.11,<br>184.08,104.10 | LysoPE(18:0)                                | HMDB11130<br>/              | 17.4 | ↓ |           |



HMDB11129

|                 |          |                      |                 |       |       |                                            |                                              |           |      |   |
|-----------------|----------|----------------------|-----------------|-------|-------|--------------------------------------------|----------------------------------------------|-----------|------|---|
| 19              | 402.3952 | [M+NH4] <sup>+</sup> | C24H48O3        | 2.56  | 10.48 | 340.36,102.09,88.07,<br>70.06,57.07        | 3-hydroxy-<br>tetracosanoic<br>acid          | MID74591  | 5.0  | ↑ |
| 20              | 306.2648 | [M+NH4] <sup>+</sup> | C16H32O4        | -2.99 | 5.5   | 73.08,84.08,99.05,<br>214.22,226.22,258.24 | 9,10-dihydroxy-<br>hexadecanoic<br>acid      | MID74569  | 9.2  | ↑ |
| 21              | 215.1282 | [M-H] <sup>-</sup>   | C11H20O4        | -3.17 | 6.12  | 199.87, 153.14,129.09                      | Undecanedioic<br>acid                        | HMDB00888 | 7.8  | ↓ |
| <sup>d</sup> 22 | 346.0554 | [M-H] <sup>-</sup>   | C10H14N5O7<br>P | -1.18 | 3.08  | 261.34,230.88,134.04                       | Adenosine<br>monophosphate                   | HMDB00045 | 18.5 | ↑ |
| <sup>d</sup> 23 | 187.097  | [M-H] <sup>-</sup>   | C9H16O4         | -3.11 | 5.22  | 169.09,143.10,125.09                       | 3-Methylsuberic<br>acid                      | HMDB59783 | 3.6  | ↑ |
| <sup>d</sup> 24 | 201.1125 | [M-H] <sup>-</sup>   | C10H18O4        | -3.64 | 5.61  | 183.10,139.11,111.08                       | Sebacic acid                                 | HMDB00792 | 15.6 | ↓ |
| 25              | 277.1435 | [M-H] <sup>-</sup>   | C16H22O4        | -3.73 | 11.38 | 233.15,205.16,134.04,<br>127.11,121.03     | Phthalic acid<br>Mono-2-<br>ethylhexyl Ester | HMDB13248 | 10.2 | ↓ |
| <sup>c</sup> 26 | 124.0076 | [M-H] <sup>-</sup>   | C2H7NO3S        | 1.71  | 2.1   | 79.96                                      | Taurine                                      | HMDB00251 | 10.6 | ↓ |
| 27              | 215.1643 | [M-H] <sup>-</sup>   | C12H24O3        | 4.5   | 4.95  | 197.15,169.16                              | Hydroxydodecan<br>oic acid                   | HMDB02059 | 20.1 | ↑ |
| <sup>d</sup> 28 | 146.0461 | [M-H] <sup>-</sup>   | C5H9NO4         | 1.5   | 2.1   | 128.04,102.06                              | L-Glutamate                                  | HMDB00148 | 5.3  | ↑ |

<sup>a</sup> RSD was calculated from QC samples. <sup>b</sup> ↑ , up-regulated; ↓ , down-regulated. <sup>c</sup>Metabolites identified by standards comparison. <sup>d</sup>Metabolite identified by MS/MS fragments comparison with standard MS/MS database (HMDB, Metlin). <sup>e</sup> Acylcarnitines identified based on the fragmentation patterns of carnitine and the corresponding acyl groups.
